# Supplementary material
Source: PubMed Central journal article supplement (PMC2610148)
Supplement: rsbl20080173s01.pdf [file rsbl20080173s01.pdf]

## SUPPLEMENTARY MATERIAL

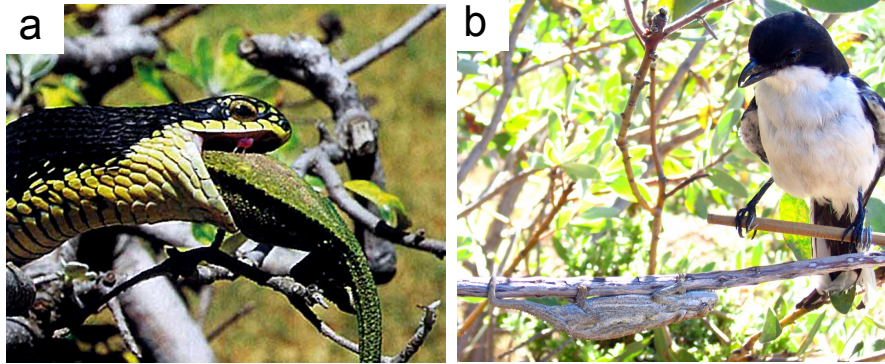

**Figure S1.**

Chameleon predators a) the boomslang is a major predator of dwarf chameleons (photo depicts a boomslang eating a male Cape dwarf chameleon, *Bradypodion pumilum*. Photo courtesy of William R. Branch, Bayworld, Port Elisabeth, South Africa); b) the stuffed fiscal shrike used in experiments elicits the typical anti-predator behavior of dorso-lateral flattening and flipping to the opposite side of the branch. The chameleons show background matching rather than other forms of camouflage such as disruptive camouflage.

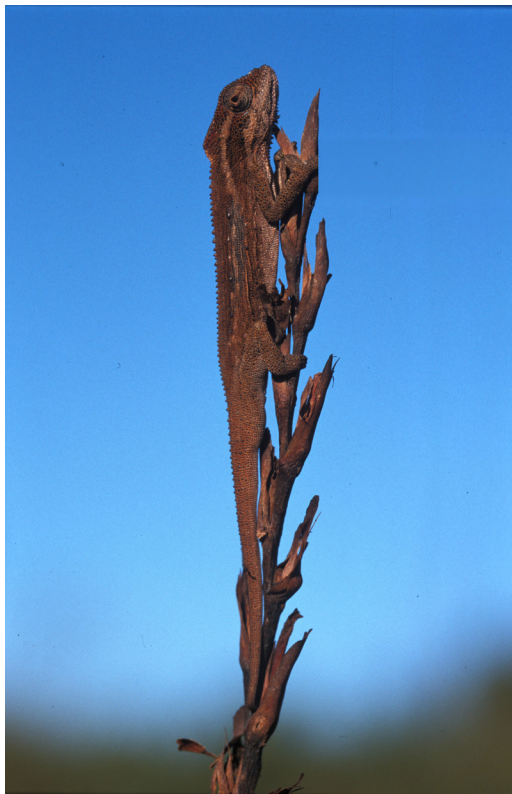

**Figure S2.**

An adult male *Bradypodion taeniabronchum* camouflaged via background matching.

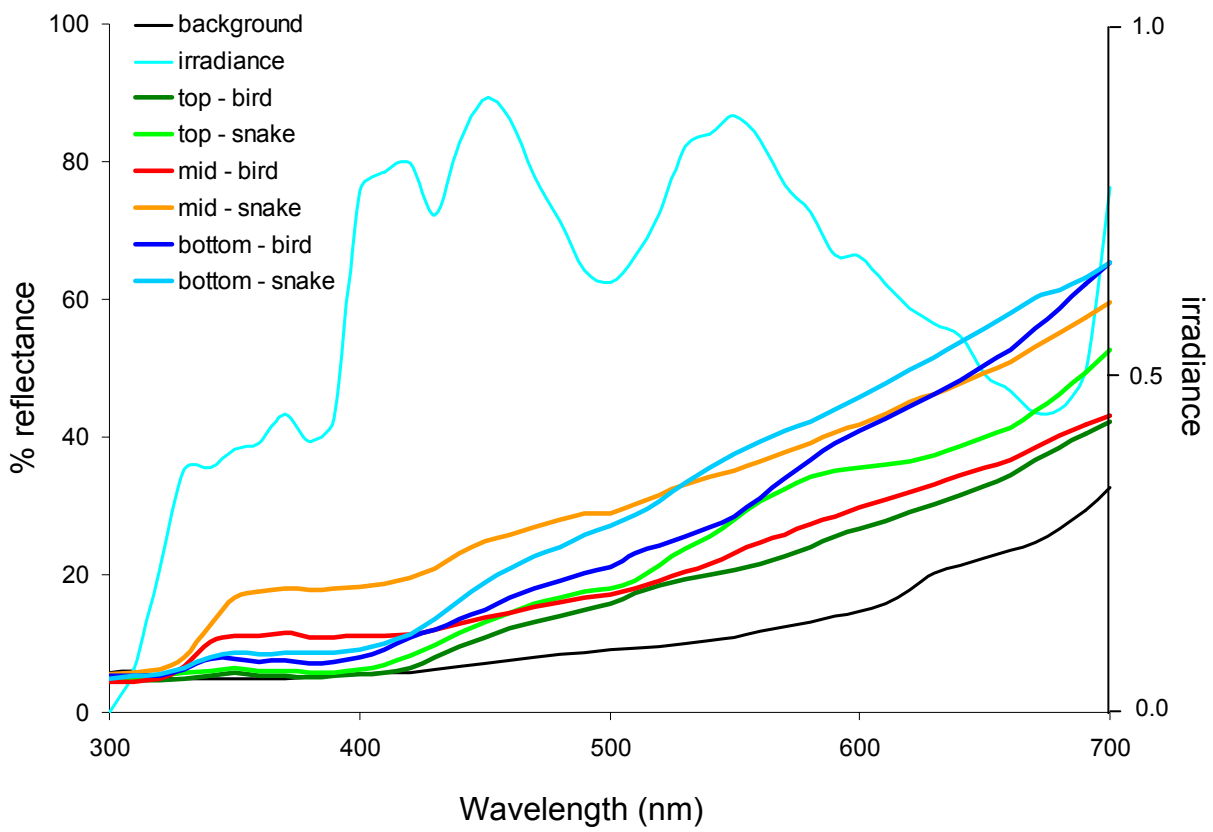

**Figure S3.**

Median reflectance of predator response colours (top = top flank, mid = mid flank, bottom = bottom flank) and background as well as irradiance (right axis).
